# Supplementary material for: Effects of Acute Hypoxic Provocation on Autonomic Nervous System in Young &ldquo;Healthy&rdquo; Smokers Measured by Heart Rate Variability
Source: Preprints.org preprint supplement (doi:10.20944/preprints201806.0325.v1), 2018-06-20
Supplement: Supplementary file 1 [file supplementary]

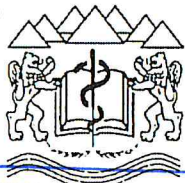

# Medical University of Plovdiv

## Scientific Ethics Committee

МЕДИЦИНСКИ УНИВЕРСИТЕТ  
РЕКТОРАТ

Rectorat  
13A Vassil Aprilov blv  
4002 Plovdiv

Phone: +359 32 / 602-588  
Fax: +359 32 / 602-534

Изм. № *1548* / 1.3.-03-2014 г.  
ПЛОВДИВ

### STATEMENT

#### of the Ethics Committee of the Medical University of Plovdiv

Regarding: **ref. number P-7654/03.12.2013: PhD research** of Dr. Zdravko Taralov – PhD student in pathophysiology doctoral program in the Pathophysiology department of the Medical Faculty; topic of the research “Assessment of the acute exogenous hypoxia impact on the autonomic nervous system and the adaptations to it during 10-days protocol”, part of the PhD research “Comparative assessment of the autonomic nervous system activity during different physiological conditions, evaluated by heart rate variability”. Scientific advisor of the PhD student – prof. Stefan Kostianev, DMSc (head of the Pathophysiology department, Medical Faculty, Medical University of Plovdiv).

During its session (No1/06.02.2014 – attached copy of the protocol), after discussion and detailed review of the submitted set of documents regarding doctoral research of the PhD work (including “Informed consent for the participants in the study” and a questionnaire) the Scientific Ethics Committee considered:

***The scientific research complies with the scientific and ethical standards and criteria***

and it is consistent with the requirements of: Helsinki declaration for ethical principles in medical research; the principles of the Good Clinical Practice; Bulgarian laws and directives for conducting clinical and scientific trials involving humans.

Date: 20.02.2014

Chair of the Committee.....

(prof. M. Stoycheva, DMSc )
